# Supplementary material for: Expanding the family of mesoionic complexes: donor properties and catalytic impact of palladated isoxazolylidenes
Source: Royal Society of Chemistry journal article supplement (doi:10.1039/c0dt00027b), 2010-01-01
Supplement: c0dt00027b.pdf [file c0dt00027b.pdf]

## Supporting Information

*belonging to*

### **Expanding the family of mesoionic complexes: Donor properties and catalytic impact of palladated isoxazolylienes**

Manuel Iglesias and Martin Albrecht<sup>\*a</sup>

*School of Chemistry and Chemical Biology, University College Dublin, Belfield, Dublin 4,  
Ireland.*

E-mail: martin.albrecht@ucd.ie; Fax: (+)353-17162501.

#### **Content**

|                                                              |    |
|--------------------------------------------------------------|----|
| Correlation of measured $\delta_p$ with calculated TEP ..... | S2 |
| Synthetic procedures .....                                   | S2 |
| Structure determination and refinement of <b>2b</b> .....    | S5 |

## Correlation of measured $\delta_P$ with calculated TEP

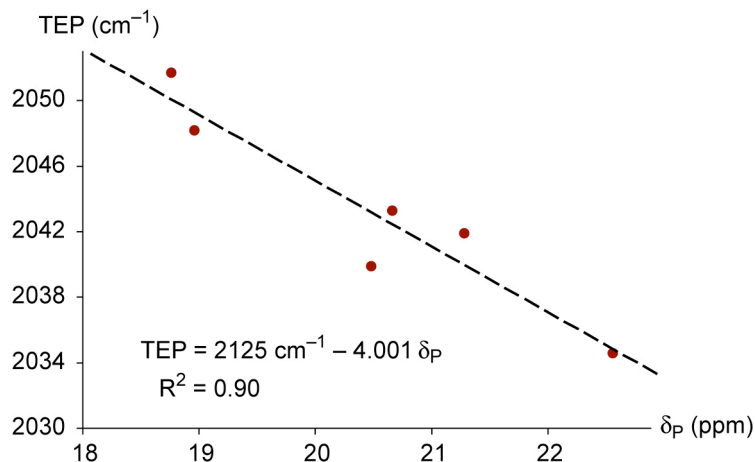

## Synthetic procedures

**General comments.** All palladation reactions were performed using standard Schlenk techniques under an argon atmosphere unless stated otherwise. Toluene and CH<sub>2</sub>Cl<sub>2</sub> were dried by passage through solvent purification columns. Complex **3**,<sup>S1</sup> and the iodo-azolium salts<sup>S2</sup> were prepared according to a previously reported procedure, all other reagents were commercially available and were used as received. All <sup>1</sup>H, <sup>13</sup>C{<sup>1</sup>H}, and <sup>31</sup>P{<sup>1</sup>H} NMR spectra were recorded on Bruker Avance spectrometers, chemical shifts ( $\delta$ ) are given in ppm and were referenced to residual solvent <sup>1</sup>H and <sup>13</sup>C resonances, and to external H<sub>3</sub>PO<sub>4</sub>, respectively (coupling constants *J* in Hz). Assignments are based either on distortionless enhancement of polarization transfer (DEPT) experiments or on homo- and heteronuclear shift correlation spectroscopy. Elemental analyses were performed by the Microanalytical Laboratory of the ETH Zurich (Switzerland).

**4-Iodo-1,3,5-trimethylisoxazolium triflate (1a).** Methyl trifluoromethanesulfonate (methyl triflate; 0.24 ml, 2.2 mmol) was added to a solution of 4-iodo-1,3,5-trimethylisoxazol in dry CH<sub>2</sub>Cl<sub>2</sub> (5 mL) and the resulting mixture was stirred for 16 h at ambient temperature. The solvent

S1 Y. Han, H. V. Huyn and G. K. Tan, *Organometallics*, 2007, **26**, 6581.

S2 (a) H. B. Bensuan and M. S. R. Naidu, *Biochemistry*, 1967, **6**, 12; (b) M. Iglesias, M. Albrecht, *submitted*.

was evaporated under reduced pressure, and the remaining residue was redissolved in  $\text{CH}_2\text{Cl}_2$  and precipitated with  $\text{Et}_2\text{O}$ . The residue was washed with  $\text{Et}_2\text{O}$  ( $3 \times 10$  mL), yielding **1a** as a white solid (630 mg, 81%).  $^1\text{H}$  NMR (360 MHz,  $\text{CDCl}_3$ ):  $\delta$  4.29 (s, 3H, N-CH<sub>3</sub>), 2.62, 2.58 (2  $\times$  s, 3H, C-CH<sub>3</sub>).  $^{13}\text{C}\{^1\text{H}\}$  NMR (100 MHz,  $\text{CDCl}_3$ ):  $\delta$  174.0, 162.8 (2  $\times$  C-Me), 121.0 ( $^1J_{\text{CF}} = 353.7$  Hz, CF<sub>3</sub>), 67.2 (C-I), 40.3 (N-CH<sub>3</sub>), 14.5, 13.8 (2  $\times$  C-CH<sub>3</sub>). Anal. Calcd. for  $\text{C}_7\text{H}_9\text{F}_3\text{INO}_4\text{S}$  (387.12): C, 21.95; H, 2.34; N, 3.62. Found: C, 21.95; H, 2.25; N, 3.58.

#### **4-Iodo-1,3,5-trimethylisoxazolium BF<sub>4</sub> (1b).**

Trimethyloxonium tetrafluoroborate (75 mg, 0.50 mmol) was added to a solution of 4-iodo-3,5-dimethylisoxazole (110 mg, 0.50 mmol) in dry  $\text{CH}_2\text{Cl}_2$  (3 mL) and the resulting mixture was stirred for 16 h at ambient temperature. The solvent was evaporated under reduced pressure, and the remaining residue was redissolved in  $\text{CH}_2\text{Cl}_2$  and precipitated with  $\text{Et}_2\text{O}$ . The residue was washed with  $\text{Et}_2\text{O}$  ( $3 \times 5$  mL), yielding **1b** as a white solid (130 mg, 85%).  $^1\text{H}$  NMR (360 MHz,  $\text{CDCl}_3$ ):  $\delta$  4.38 (s, 3H, N-CH<sub>3</sub>), 2.71, 2.68 (2  $\times$  s, 3H, C-CH<sub>3</sub>).  $^{13}\text{C}\{^1\text{H}\}$  NMR (100 MHz,  $\text{CDCl}_3$ ):  $\delta$  174.4, 162.6 (2  $\times$  C-Me), 66.9 (C-I), 40.3 (N-CH<sub>3</sub>), 13.7, 13.0 (2  $\times$  C-CH<sub>3</sub>). Anal. Calcd. for  $\text{C}_6\text{H}_{10}\text{BF}_4\text{INO}$  (324.85): C, 22.18; H, 2.79; N, 3.96. Found: C, 22.58; H, 2.78; N, 3.96.

#### ***Trans*-(1,3,5-trimethylisoxazolin-4-ylidene)iodobis(triphenylphosphine)palladium(II) BF<sub>4</sub> (2b).**

Solid  $\text{Pd}(\text{PPh}_3)_4$  (144 mg, 0.125 mmol) and 4-iodo-1,3,5-trimethylisoxazolium tetrafluoroborate **1b** (40 mg, 0.125 mmol) were dissolved in dry toluene (10 mL). After stirring for 16 h at ambient temperature, the resulting pale orange suspension was concentrated to dryness. The precipitate was redissolved in  $\text{CH}_2\text{Cl}_2$  (3 mL) and precipitated with  $\text{Et}_2\text{O}$  ( $3 \times 10$  mL), subsequently washed with copious amounts of  $\text{Et}_2\text{O}$  until the filtrate was colourless and dried under vacuum to afford **2b** as a pale yellow solid (100 mg, 84%).  $^1\text{H}$  NMR (360 MHz,  $\text{CD}_2\text{Cl}_2$ ):  $\delta$  7.66 – 7.40 (m, 30H, H<sub>ar</sub>), 3.88 (s, 3H, N-CH<sub>3</sub>), 2.06, 1.76 (2  $\times$  s, 3H, C-CH<sub>3</sub>).  $^{13}\text{C}\{^1\text{H}\}$  NMR (100 MHz,  $\text{CD}_2\text{Cl}_2$ ):  $\delta$  167.9 ( $^2J_{\text{CP}} = 3.8$  Hz, C-Pd), 162.6 (C-Me), 134.2 ( $^2J_{\text{CP}} = 6.2$  Hz, C<sub>ar</sub>), 131.4 (C<sub>ar</sub>), 129.2 ( $^1J_{\text{CP}} = 25.1$  Hz, C<sub>ar</sub>), 128.8 ( $^3J_{\text{CP}} = 5.2$  Hz, C<sub>ar</sub>), 39.6 (N-CH<sub>3</sub>), 15.2, 13.7 (2  $\times$  C-CH<sub>3</sub>).  $^{31}\text{P}$  NMR (202 MHz,  $\text{CD}_2\text{Cl}_2$ ):  $\delta$  23.5 ( $\text{PPh}_3$ ). Anal. Calcd. for  $\text{C}_{42}\text{H}_{39}\text{BF}_4\text{INOP}_2\text{Pd}$  (955.84): C, 52.78; H, 4.11; N, 1.47. Found: C, 52.44; H, 4.27; N, 1.51.

**General procedure for the preparation of the palladium complexes 4–7.** Solid Pd(PPh<sub>3</sub>)<sub>4</sub> and the azolium triflate (1 molequiv.) were dissolved in dry CH<sub>2</sub>Cl<sub>2</sub> and stirred for 16 h at ambient temperature. After concentrating the pale orange solution to 3 mL, the product precipitated by addition of Et<sub>2</sub>O (10 mL). The precipitate was redissolved into CH<sub>2</sub>Cl<sub>2</sub> (3 mL) and precipitated with Et<sub>2</sub>O (3×), and subsequently washed with Et<sub>2</sub>O until the filtrate was colourless. The residue was then dried in vacuo.

***Trans*-(1,3-dimethylimidazolin-4-ylidene)iodobis(triphenylphosphine)palladium(II) triflate (4).** Starting from Pd(PPh<sub>3</sub>)<sub>4</sub> (288 mg, 0.25 mmol) and 4-iodo-1,3-dimethylimidazolium triflate (105 mg, 0.25 mmol) in CH<sub>2</sub>Cl<sub>2</sub> (20 mL). Yield for **4**: 180 mg (72%). <sup>1</sup>H NMR (360 MHz, CD<sub>2</sub>Cl<sub>2</sub>): δ 8.17 (s, 1H, NCHN), 7.62–7.45 (m, 30H, H<sub>ar</sub>), 5.70 (s, 1H, H<sub>imi</sub>), 3.31, 3.24 (2 × s, 3H, N–CH<sub>3</sub>). <sup>13</sup>C{<sup>1</sup>H} NMR (100 MHz, CD<sub>2</sub>Cl<sub>2</sub>): δ 145.7 (<sup>2</sup>J<sub>CP</sub> = 7.1, C–Pd), 136.7 (NCHN), 134.8 (<sup>2</sup>J<sub>CP</sub> = 4.9, C<sub>ar</sub>), 131.5 (C<sub>ar</sub>), 131.0 (<sup>1</sup>J<sub>CP</sub> = 20.1, C<sub>ar</sub>), 128.8 (<sup>3</sup>J<sub>CP</sub> = 4.1, C<sub>ar</sub>), 123.3 (<sup>3</sup>J<sub>CP</sub> = 3.8, C<sub>imi</sub>–H), 122.53 (<sup>1</sup>J<sub>CF</sub> = 255.1 Hz, CF<sub>3</sub>), 38.0, 35.7 (2 × N–CH<sub>3</sub>). <sup>31</sup>P NMR (202 MHz, CD<sub>2</sub>Cl<sub>2</sub>): δ 20.66 (PPh<sub>3</sub>). Anal. Calcd. for C<sub>42</sub>H<sub>38</sub>F<sub>3</sub>IN<sub>2</sub>O<sub>3</sub>P<sub>2</sub>PdS (1003.09) × Et<sub>2</sub>O: C, 51.29; H, 4.49; N, 2.60. Found: C, 51.39; H, 4.12; N, 2.91.

***Trans*-(1,2,3,5-tetramethylimidazolin-4-ylidene)iodobis(triphenylphosphine)palladium(II) triflate (5).** Starting from Pd(PPh<sub>3</sub>)<sub>4</sub> (288 mg, 0.25 mmol) and 4-iodo-1,2,3,5-tetramethylimidazolium triflate (100 mg, 0.25 mmol) in CH<sub>2</sub>Cl<sub>2</sub> (10 mL). Yield 175 mg (0.17 mmol, 68%). Analytically pure material was obtained by recrystallisation of **5** from CH<sub>2</sub>Cl<sub>2</sub>/Et<sub>2</sub>O. <sup>1</sup>H NMR (360 MHz, CD<sub>2</sub>Cl<sub>2</sub>): δ 7.60–7.40 (m, 30H, H<sub>ar</sub>), 3.07, 3.03 (2 × s, 3H, N–CH<sub>3</sub>), 1.96, 1.59 (2 × s, 3H, CCH<sub>3</sub>). <sup>13</sup>C{<sup>1</sup>H} NMR (100 MHz, CD<sub>2</sub>Cl<sub>2</sub>): δ 142.3 (NCN), 137.4 (<sup>2</sup>J<sub>CP</sub> = 8.8, C–Pd), 134.5 (<sup>2</sup>J<sub>CP</sub> = 6.1, C<sub>ar</sub>), 131.2 (C<sub>ar</sub>), 130.6 (<sup>1</sup>J<sub>CP</sub> = 24.8, C<sub>ar</sub>), 128.3 (<sup>3</sup>J<sub>CP</sub> = 5.2, C<sub>ar</sub>), 126.8 (<sup>3</sup>J<sub>CP</sub> = 4.8, C<sub>imi</sub>–Me), 121.0 (<sup>1</sup>J<sub>CF</sub> = 270.0 Hz, CF<sub>3</sub>), 36.6, 32.1 (2 × N–CH<sub>3</sub>), 10.9, 10.3 (2 × C<sub>imi</sub>–CH<sub>3</sub>). <sup>31</sup>P NMR (202 MHz, CD<sub>2</sub>Cl<sub>2</sub>): δ 20.48 (PPh<sub>3</sub>). Anal. Calcd. for C<sub>43</sub>H<sub>40</sub>F<sub>3</sub>IN<sub>2</sub>O<sub>3</sub>P<sub>2</sub>PdS (1031.15) × 0.5 CH<sub>2</sub>Cl<sub>2</sub>: C, 49.69; H, 4.22; N, 2.60. Found: C, 49.23; H, 3.90; N, 2.58.

***Trans*-(1,3-dimethylpyridin-2-ylidene)iodobis(triphenylphosphine)palladium(II) triflate (6).** Starting from Pd(PPh<sub>3</sub>)<sub>4</sub> (288 mg, 0.25 mmol) and 2-iodo-1,3-dimethylpyridinium triflate (94 mg,

0.25 mmol) in CH<sub>2</sub>Cl<sub>2</sub> (20 mL). Yield 192 mg (0.19 mmol, 76%). <sup>1</sup>H NMR (360 MHz, CD<sub>2</sub>Cl<sub>2</sub>): δ 7.88 (d, <sup>3</sup>J<sub>HH</sub> = 5.9 Hz, 1H, H<sub>py</sub>), 7.58–7.43 (m, 30H, H<sub>ar</sub>), 6.97–6.89 (m, 2H, H<sub>py</sub>), 4.13 (s, 3H, N–CH<sub>3</sub>), 2.44 (s, 3H, C–CH<sub>3</sub>). <sup>13</sup>C{<sup>1</sup>H} NMR (100 MHz, CD<sub>2</sub>Cl<sub>2</sub>): δ 193.7 (<sup>2</sup>J<sub>CP</sub> = 4.9 Hz, C–Pd), 144.9 (<sup>2</sup>J<sub>CP</sub> = 2.2 Hz, C<sub>py</sub>), 143.0 (C<sub>py</sub>), 138.5 (C<sub>py</sub>), 134.8 (broad, C<sub>ar</sub>), 132.0 (C<sub>ar</sub>), 130.5 (<sup>1</sup>J<sub>CP</sub> = 25.2 Hz, C<sub>ar</sub>), 129.2 (<sup>3</sup>J<sub>CP</sub> = 5.1 Hz, C<sub>ar</sub>), 123.3 (C<sub>py</sub>–Me), 121.5 (<sup>1</sup>J<sub>CF</sub> = 319.3 Hz, CF<sub>3</sub>), 52.5 (N–CH<sub>3</sub>), 24.6 (C<sub>py</sub>–CH<sub>3</sub>). <sup>31</sup>P NMR (202 MHz, CD<sub>2</sub>Cl<sub>2</sub>): δ 18.96 (PPh<sub>3</sub>). Anal. Calcd. for C<sub>44</sub>H<sub>39</sub>F<sub>3</sub>INO<sub>3</sub>P<sub>2</sub>PdS (1014.13): C, 52.11; H, 3.88; N, 1.38. Found: C, 52.18; H, 3.79; N, 1.40.

***Trans*-(1,3-dimethylimidazolin-2-ylidene)iodobis(triphenylphosphine)palladium(II) triflate (7).** Starting from Pd(PPh<sub>3</sub>)<sub>4</sub> (288 mg, 0.25 mmol) and 2-iodo-1,3-dimethylimidazolium triflate (92 mg, 0.25 mmol) in CH<sub>2</sub>Cl<sub>2</sub> (20 mL). Yield 162 mg (65%). <sup>1</sup>H NMR (360 MHz, DMSO-*d*<sub>6</sub>): δ 7.60–7.45 (m, 30H, H<sub>ar</sub>), 6.72 (s, 2H, H<sub>imi</sub>), 3.26 (s, 6H, N–CH<sub>3</sub>). <sup>13</sup>C{<sup>1</sup>H} NMR (100 MHz, CD<sub>2</sub>Cl<sub>2</sub>): δ 162.3 (<sup>2</sup>J<sub>CP</sub> = 8.4 Hz, C–Pd), 134.2 (<sup>2</sup>J<sub>CP</sub> = 6.2 Hz, C<sub>ar</sub>), 131.6 (C<sub>ar</sub>), 130.1 (<sup>1</sup>J<sub>CP</sub> = 25.7 Hz, C<sub>ar</sub>), 128.9 (<sup>3</sup>J<sub>CP</sub> = 5.2 Hz, C<sub>ar</sub>), 124.7 (C<sub>imi</sub>), 121.0 (<sup>1</sup>J<sub>CF</sub> = 321.3 Hz, CF<sub>3</sub>), 37.0 (N–CH<sub>3</sub>). <sup>31</sup>P NMR (202 MHz, CD<sub>2</sub>Cl<sub>2</sub>): δ 18.76 (PPh<sub>3</sub>). Anal. Calcd. for C<sub>42</sub>H<sub>38</sub>F<sub>3</sub>IN<sub>2</sub>O<sub>3</sub>P<sub>2</sub>PdS (1003.11): C, 50.29; H, 3.82; N, 2.79. Found: C, 50.23; H, 3.85; N, 2.77.

### Structure determination and refinement of 2b

Suitable crystals of **2b** were obtained as yellow plates. The intensity data were collected at 173 K on a Stoe Mark II-Image Plate Diffraction System equipped with a two-circle goniometer and using MoK $\alpha$  graphite monochromated radiation ( $\lambda$  = 0.71073 Å). The image plate distance was 130 mm. The structure was solved by direct methods using SHELXS-97<sup>S3</sup> and refined by full-matrix least-squares on  $F^2$  with SHELXL-97.<sup>S2</sup> The non-hydrogen atoms were refined anisotropically, and the hydrogen atoms were included in calculated positions and treated as riding atoms using SHELXL default parameters. A semi-empirical absorption correction was applied using the MULscanABS routine in PLATON.<sup>S4</sup>

The crystal was a twin. As a result of the twin integration, 35% of reflections are overlapping and only 65% have been used for the structure refinement. Further details on data collection and refinement parameters are collected in Table S1. Crystallographic data (excluding structure

S3 G. M. Scheldrick, *Acta Crystallogr. A*, 2008, **64**, 112.

S4 A. L. Spek, *Acta Crystallogr. D*, 2009, **65**, 148.

factors) for structure **2b** have been deposited with the Cambridge Crystallographic Data Centre as supplementary publication nos. CCDC [xxx](#). Copies of the data can be obtained free of charge on application to CCDS, 12 Union Road, Cambridge CB2 1EZ, UK [Fax: (int.) +44-1223-336-033; E-mail: [deposit@ccds.cam.ac.uk](mailto:deposit@ccds.cam.ac.uk)].

**Table S1** Crystallographic data for complex **2b**.

|                                                                          |                                                                                    |
|--------------------------------------------------------------------------|------------------------------------------------------------------------------------|
| crystal colour, shape                                                    | yellow plate                                                                       |
| crystal size /mm                                                         | 0.30 × 0.18 × 0.12                                                                 |
| empirical formula                                                        | C <sub>42</sub> H <sub>41</sub> BF <sub>4</sub> INO <sub>3</sub> P <sub>2</sub> Pd |
| <i>F</i> <sub>w</sub> /g mol <sup>-1</sup>                               | 989.81                                                                             |
| <i>T</i> /K                                                              | 173(2)                                                                             |
| crystal system                                                           | triclinic                                                                          |
| space group                                                              | P-1 (No. 2)                                                                        |
| unit cell dimensions                                                     |                                                                                    |
| <i>a</i> /Å                                                              | 13.3917(9)                                                                         |
| <i>b</i> /Å                                                              | 15.7897(10)                                                                        |
| <i>c</i> /Å                                                              | 20.5894(15)                                                                        |
| <i>α</i> /deg                                                            | 92.386(6)                                                                          |
| <i>β</i> /deg                                                            | 99.693(6)                                                                          |
| <i>γ</i> /deg                                                            | 90.623(5)                                                                          |
| <i>V</i> /Å <sup>3</sup>                                                 | 4287.1(5)                                                                          |
| <i>Z</i>                                                                 | 4                                                                                  |
| <i>D</i> <sub>calc</sub> /g cm <sup>-3</sup>                             | 1.534                                                                              |
| <i>μ</i> /mm <sup>-1</sup>                                               | 1.283                                                                              |
| measured reflections                                                     | 18577                                                                              |
| independent reflections                                                  | 9996                                                                               |
| observed reflections [ <i>I</i> > 2σ( <i>I</i> )]                        | 7997                                                                               |
| <i>R</i> <sub>int</sub>                                                  | 0.0708                                                                             |
| transmission range                                                       | 0.588 – 0.934                                                                      |
| parameters restraints                                                    | 974, 0                                                                             |
| <i>R</i> <sub>1</sub> , <sup>a</sup> <i>wR</i> <sub>2</sub> <sup>b</sup> | 0.1155, 0.3298                                                                     |
| GOF                                                                      | 1.082                                                                              |
| min/max residual density /e Å <sup>-3</sup>                              | -1.071, 2.029                                                                      |

$$^a R_1 = \sum ||F_o| - |F_c|| / \sum |F_o| \text{ for all } I > 2\sigma(I) \quad ^b wR_2 = [\sum w(F_o^2 - F_c^2)^2 / \sum (w(F_o^4))]^{1/2}$$
